# Supplementary material for: SSFinder: High Throughput CRISPR-Cas Target Sites Prediction Tool
Source: Hindawi journal article supplement (doi:10.1155/2014/742482), 2014-01-01
Supplement: f1 [file 742482.f1.pdf]

**Supplementary table 1.** Comparison of the SSFinder with other available tools.

| <b>Name of the tool</b> | <b>Link</b>                                                                                                                                     | <b>Input sequence/genome limit</b>                  | <b>Excess</b>        | <b>Adjustability</b> |
|-------------------------|-------------------------------------------------------------------------------------------------------------------------------------------------|-----------------------------------------------------|----------------------|----------------------|
| CRISPR Design tool      | <a href="http://www.broadinstitute.org/mpg/crispr_design/">http://www.broadinstitute.org/mpg/crispr_design/</a>                                 | 1000 bp                                             | Internet dependent   | Non-editable         |
| CRISPR Design           | <a href="http://crispr.mit.edu/">http://crispr.mit.edu/</a>                                                                                     | Limited to 15 genome (only 1 from plants )          | Internet dependent   | Non-editable         |
| CRISPR Target           | <a href="http://bioanalysis.otago.ac.nz/CRISPRTarget/crispr_analysis.html">http://bioanalysis.otago.ac.nz/CRISPRTarget/crispr_analysis.html</a> | Limited to the 50 Mb user database at web interface | Internet dependent   | Flexible             |
| ZiFiT Targeter          | <a href="http://zifit.partners.org/ZiFiT/ChoiceMenu.aspx">http://zifit.partners.org/ZiFiT/ChoiceMenu.aspx</a>                                   | Limited to small number of sequences                | Internet dependent   | Non-editable         |
| SSFinder                | <a href="http://code.google.com/p/ssfinder">http://code.google.com/p/ssfinder</a>                                                               | Useful for large genomes                            | Internet independent | Editable             |
